# Supplementary material
Source: Royal Society of Chemistry journal article supplement (https://www.rsc.org/suppdata/dt/1999/4139/905814a.doc)
Supplement: Supplementary file 1 [file 905814a.doc]

**Supplementary material**

#### Experimental

Unless stated otherwise materials were obtained from commercial suppliers and used without further purification. Solvents were dried over suitable reagents and freshly distilled under dry nitrogen before use. CDCl3 was passed down a 5 cm-thick alumina column and stored under N2 over molecular sieves (4 Å). All reactions were carried out using modified Schlenk techniques under a dry nitrogen atmosphere. ButONa was dissolved in THF and the resulting suspension filtered through a glass frit to remove insoluble impurities. For column chromatography Geduran SI (E. Merck, 0.040-0.063 mm) was used. Routine thin-layer chromatography analysis were done by using plates coated with Merck Kieselgel 60 GF254.

IR spectra were recorded on a Perkin-Elmer 1600 spectrometer (4000-400 cm-1). Routine 1H, 13C-{1H}, and 31P-{1H} NMR spectra were recorded on Bruker AC-200 (1H: 200.1 MHz; 13C: 50.3 MHz; 31P: 81.0 MHz), Bruker AC-300 (1H: 300.1 MHz; 31P: 121.5 MHz), Bruker AM-400 and Advance 400 (1H: 400.1 MHz; 13C: 100.6 MHz), and a Bruker ARX-500 (1H: 500.1 MHz; 13C: 125.8 MHz; 31P: 202.5 MHz) spectrometers. The 2-D (1H -1H COSY, 1H-X CORR, ROESY) NMR spectra were recorded on Bruker ARX-500 and/or Advance 400 equipment’s using standard pulse sequence and Bruker software for treatment of the acquired data. Assignment of the protons and carbon atoms were confirmed by the 2-D experiments cited above. The variable temperature NMR studies were recorded on a Bruker ARX-500 spectrometer for complexes **5** and **7**. All temperatures were corrected by reference to the ethylene glycol spin temperature, and are estimated to be reliable to within ±5 K. 1H chemical shifts are reported relative to residual protiated solvents (CHCl3, ** 7.26; CH2Cl2, ** 5.32). The 13C chemical shifts are referenced relative to deuterated solvents (CDCl3, ** 77.00; CD2Cl2, ** 52.00), and the 31P NMR data are given relative to external H3PO4. A positive sign denotes a value downfield from the reference. Abbreviations used are s = singlet, d = doublet, br = broad and vt = virtual triplet. The mass spectra were recorded on a ZAB HF VG analytical spectrometer using *m*-nitrobenzyl alcohol or tetraglyme (2,5,8,11,14-pentaoxapentadecane) as a matrix. Elemental analyses were performed by the Service de Microanalyse, Centre de Recherche Chimie, Strasbourg. Melting points were determined with a Büchi 535 capillary melting-point apparatus and are uncorrected. UV-visible spectra were recorded on UVIKON-930 spectrophotometers with a thermostated cell compartment controlled by a LANDAU circulation system.
